# Supplementary material
Source: HighWire-hosted journal article supplement (https://jnm.snmjournals.org/highwire/filestream/94160/field_highwire_adjunct_files/0/73130_Supplemental_Figures.pdf)
Supplement: 73130_Supplemental_Figures.pdf [file 73130_Supplemental_Figures.pdf]

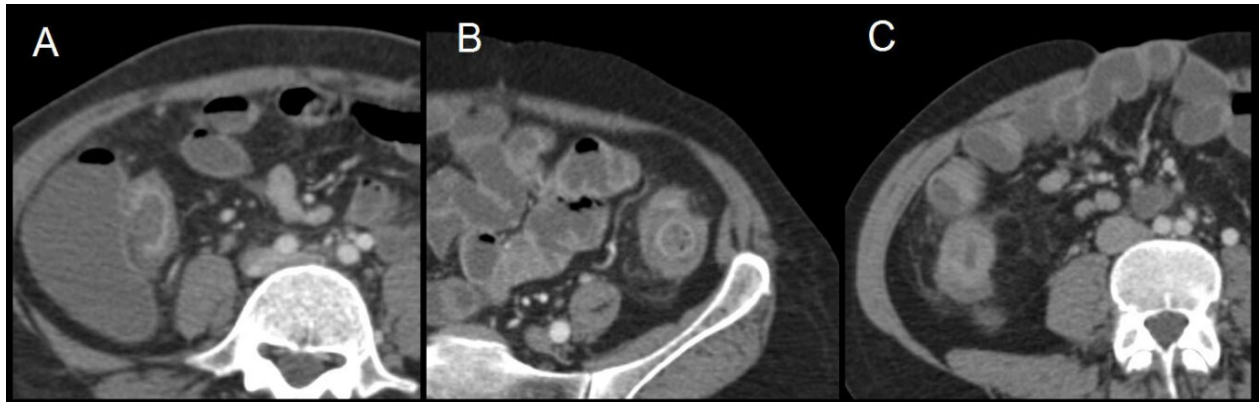

Suppl. Fig 1: CTE Fat Infiltration. Axial reformatted imaging showing by visual assessment: a) abnormal bowel segment with absent fat infiltration; b) abnormal bowel segment with moderate fat infiltration; c) abnormal bowel segment with intense fat infiltration.

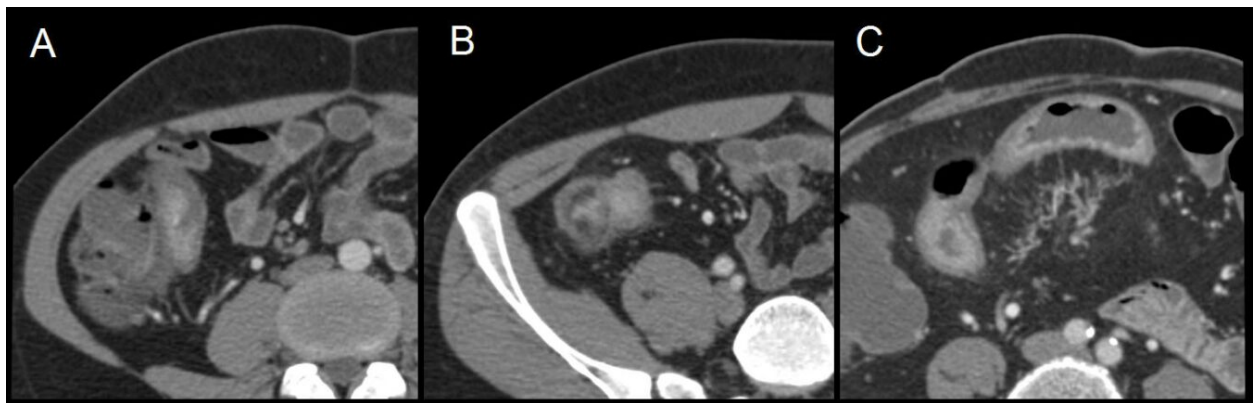

Suppl. Fig 2: CTE Comb Sign. Axial reformatted imaging showing by visual assessment: a) abnormal bowel segment with absent comb sign; b) abnormal bowel segment with moderate comb sign; c) abnormal bowel segment with intense comb sign.

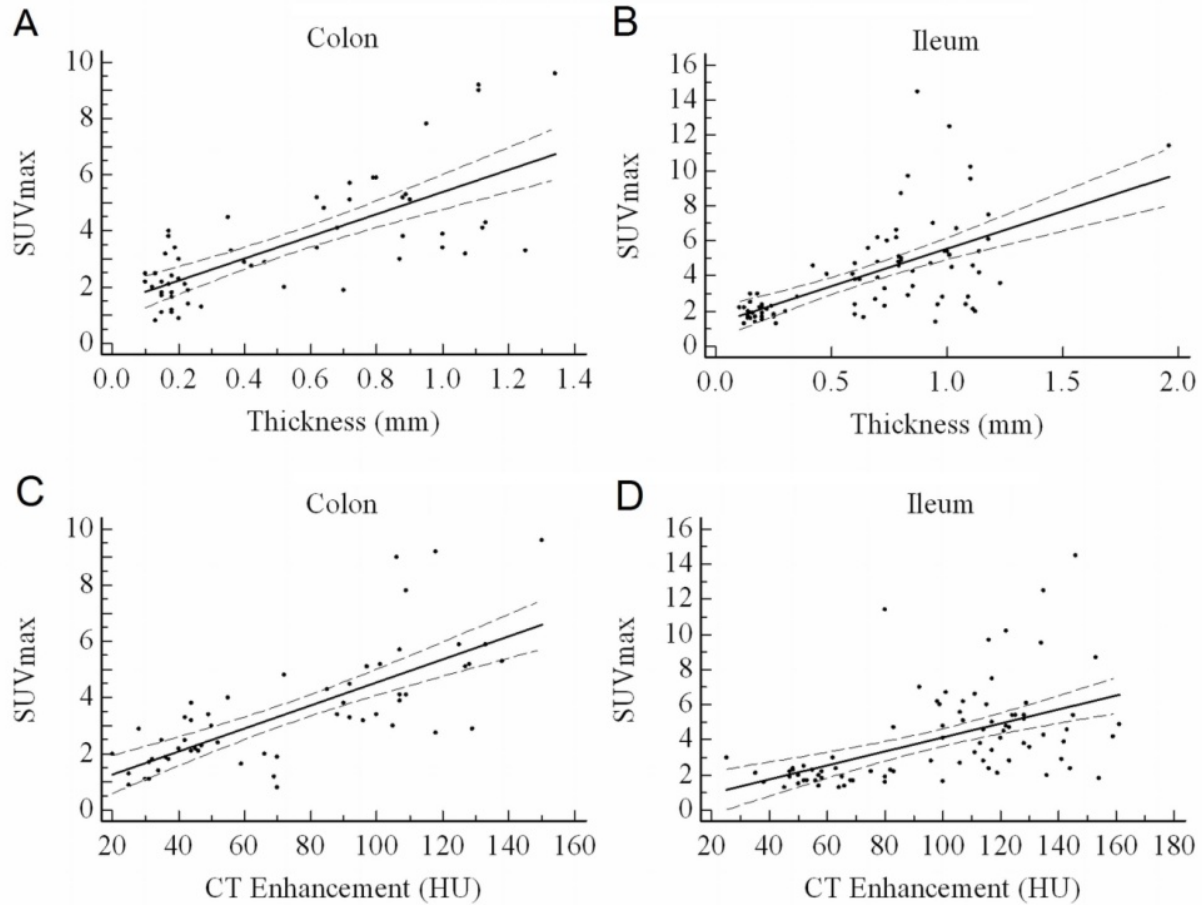

Suppl. Fig 3: Upper row: Graph shows correlation between SUVmax measurements and wall thickness (mm) in colon and ileum segments ( $r = 0.69$ ,  $p < 0.00001$  and  $r = 0.65$ ,  $p < 0.00001$ ; respectively). Lower row: Graph shows correlation between SUVmax measurements and mural enhancement (HU) in colon and ileum segments ( $r = 0.77$ ,  $p < 0.00001$  and  $r = 0.59$ ,  $p < 0.00001$ ; respectively).
